# Supplementary material
Source: HighWire-hosted journal article supplement (https://www.cmajopen.ca/highwire/filestream/88834/field_highwire_adjunct_files/2/open-2021-0140-3-at.pdf)
Supplement: open-2021-0140-3-at.pdf [file open-2021-0140-3-at.pdf]

Supplemental Figure 1. Trends in low-value radiograph use by indication at Ontario emergency departments from 2010-2019

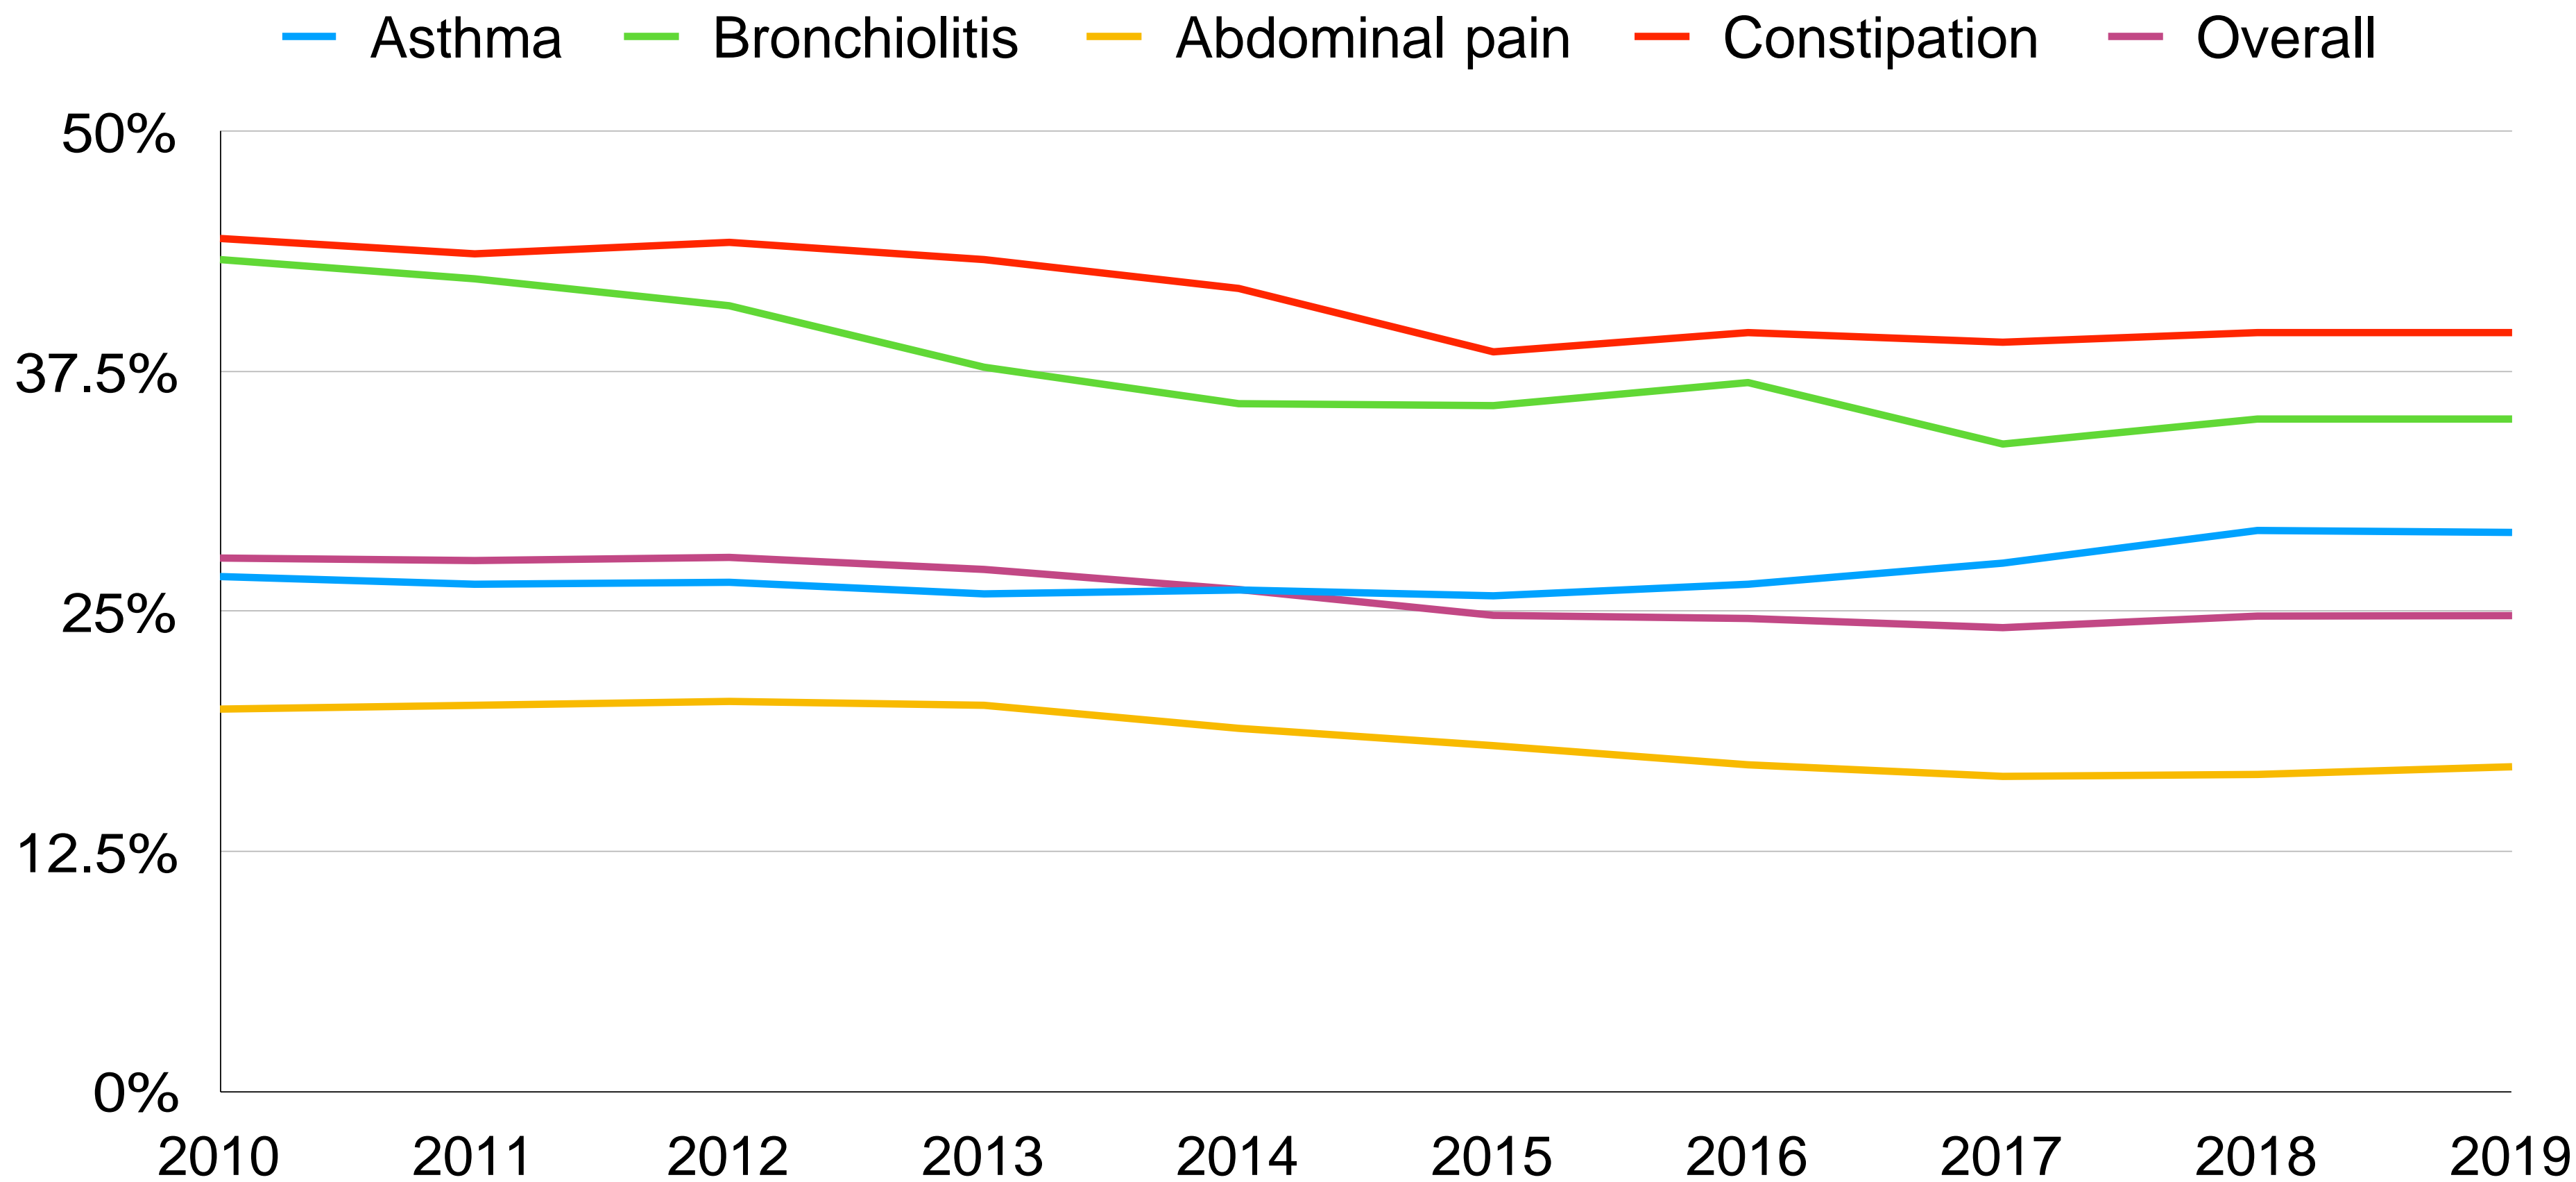

Appendix 3, as supplied by the authors. Appendix to: Freire GC, Diong C, Gandhi S, et al. Variation in low-value radiograph use for children in the emergency department: a cross-sectional study of administrative databases. *CMAJ Open* 2022. doi: 10.9778/cmajo.20210140. Copyright © 2022 The Author(s) or their employer(s). To receive this resource in an accessible format, please contact us at [cmajgroup@cmaj.ca](mailto:cmajgroup@cmaj.ca).
